# Supplementary material
Source: publisher site journal article supplement (https://www.dovepress.com/article/251490)
Supplement: Supplementary file 1 [file get_supplementary_file.php]

Supplementary1. All primers used in this study were listed below.

| Primers             | Sequences                  | Size   |
|---------------------|----------------------------|--------|
| <i>optrA</i> -F1    | CAGGTGGTCAGCGAACTAAGA      | 792bp  |
| <i>optrA</i> -R1    | AGCCAAGAGCAGTTCTGACC       |        |
| <i>optrA</i> -F     | TTGTCCAAAGCCACCTTTG        | 1968bp |
| <i>optrA</i> -R     | TTACATAACTTCCAATTCTCTC     |        |
| 23S-V/F             | AGTTTGACTGGGGCGGTC         | 429bp  |
| 23S-V/R             | CCGGTCCTCTCGTACTA          |        |
| <i>rplC</i> -F      | ATGACCAAAGGAATCTTAGGG      | 618bp  |
| <i>rplC</i> -R      | CACAGCTGATTTGATWGTGATT     |        |
| <i>rplD</i> -F      | GCCGAATGTAGCATTATTCAA      | 617bp  |
| <i>rplD</i> -R      | CAAGCACCTCCTCAATTTGAGT     |        |
| <i>cfr</i> -F       | TGAAGTATAAAGCAGGTTGGGAGTCA | 746bp  |
| <i>cfr</i> -R       | ACCATATAATTGACCACAAGCAGC   |        |
| <i>cfr</i> (B)-F    | TGAGCATATACGAGTAACCTCAAGA  | 293bp  |
| <i>cfr</i> (B)-R    | CGCAAGCAGCGTCTATATCA       |        |
| <i>cfr</i> (C)-F    | CGACGCATCACCATTTCGAC       | 367bp  |
| <i>cfr</i> (C)-R    | GGCTTGAGGGCACCATAGTT       |        |
| <i>cfr</i> (D)-F    | TGCGCTACTGGAAAAATTGGC      | 671bp  |
| <i>cfr</i> (D)-R    | TATAATTGGCCACAGGCAGCA      |        |
| <i>rplV</i> -F(efm) | GGACATGCTGCTGACGATA        | 486bp  |
| <i>rplV</i> -R(efm) | ACCATTTAGCATCCCAGTCG       |        |
| <i>rplV</i> -F(efa) | GCCACGTTGCTGACGATAA        | 476bp  |
| <i>rplV</i> -R(efa) | ACCCACTGATTGTCCCTCCT       |        |
| <i>poxA</i> -F      | GGAAGTTGCTCAGTACGGCT       | 975bp  |
| <i>poxA</i> -R      | TCAATGCAGAGCAGGAAGCA       |        |

Supplementary 2. Except *optrA* gene, the remaining genes such as *cfr*, *cfr(B)*, *cfr(C)*, *cfr(D)*, *rplD*, *rplC*, *rplV*, *poxtA* and 23S rRNA V region, concerned with linezolid resistance were amplified and sequenced in 20 *optrA*-positive *enterococcus faecalis* and *enterococcus faecium*.

Detections and mutations of these genes were presented below.

| Isolates | Species | 23S rRNA<br>V region | <i>cfr</i> | <i>cfr(B)</i> | <i>cfr(C)</i> | <i>cfr(D)</i> | <i>rplC</i> | <i>rplD</i>         | <i>rplV</i> | <i>poxtA</i> |
|----------|---------|----------------------|------------|---------------|---------------|---------------|-------------|---------------------|-------------|--------------|
| 8        | efa     | N                    | N          | N             | N             | N             | NM          | W                   | NM          | N            |
| 37       | efa     | N                    | N          | N             | N             | N             | NM          | F101L               | NM          | N            |
| 91       | efa     | N                    | N          | N             | N             | N             | G4R         | K8N, F101L, E202K   | NM          | N            |
| 154      | efm     | N                    | N          | N             | N             | N             | NM          | K8Ter, F101L        | NM          | N            |
| 155      | efa     | N                    | N          | N             | N             | N             | NM          | V4G, F101L, E202G   | NM          | N            |
| 185      | efa     | N                    | N          | N             | N             | N             | NM          | F101L               | NM          | N            |
| 216      | efa     | N                    | N          | N             | N             | N             | G4D         | F101L, E202G        | NM          | N            |
| 223      | efa     | N                    | N          | N             | N             | N             | G4K         | F101L, E202G, V203W | NM          | N            |
| 280      | efa     | N                    | N          | N             | N             | N             | NM          | F101L, E202R        | NM          | N            |
| 297      | efa     | N                    | N          | N             | N             | N             | G4K         | F101L               | NM          | N            |
| 366      | efa     | N                    | N          | N             | N             | N             | G4K         | F101L, E201V        | NM          | N            |
| 397      | efa     | N                    | N          | N             | N             | Y             | G4R G7W     | F101L, E202G        | NM          | N            |
| 402      | efm     | -                    | N          | N             | N             | N             | T150A       | F101L               | NM          | NM           |
| 404      | efa     | N                    | N          | N             | N             | N             | NM          | F101L, E202G        | NM          | N            |
| 413      | efm     | -                    | N          | N             | N             | N             | T150A       | F101L, E202R        | NM          | N            |
| 421      | efm     | -                    | N          | N             | N             | N             | T150A       | K8Ter, F101L        | NM          | N            |
| 422      | efm     | -                    | N          | N             | N             | N             | T150A       | F101L               | NM          | N            |
| 446      | efa     | N                    | N          | N             | N             | N             | G4K         | F101L               | NM          | N            |
| 550      | efa     | N                    | N          | N             | N             | N             | NM          | F101L, V203G        | NM          | N            |
| 551      | efa     | N                    | N          | N             | N             | N             | NM          | F101L, E202G        | NM          | N            |

Note: NM: No Mutations, N: No detections, Y: Positive detection. K: Lys, D: Asp, R: Arg, A: Ala, F: Phe, V: Val, E: Glu, W: Trp, L: Leu, T: Thr, N: Asn, Ter: Termination codon.

Supplementary3. The results of PFGE among 20 *optrA*-positive *enterococcus faecalis* and *enterococcus faecium*. We defined types according to the value of the homologous percentage. For example, if the percentage of isolates was over 80%, we considered them as the same type.

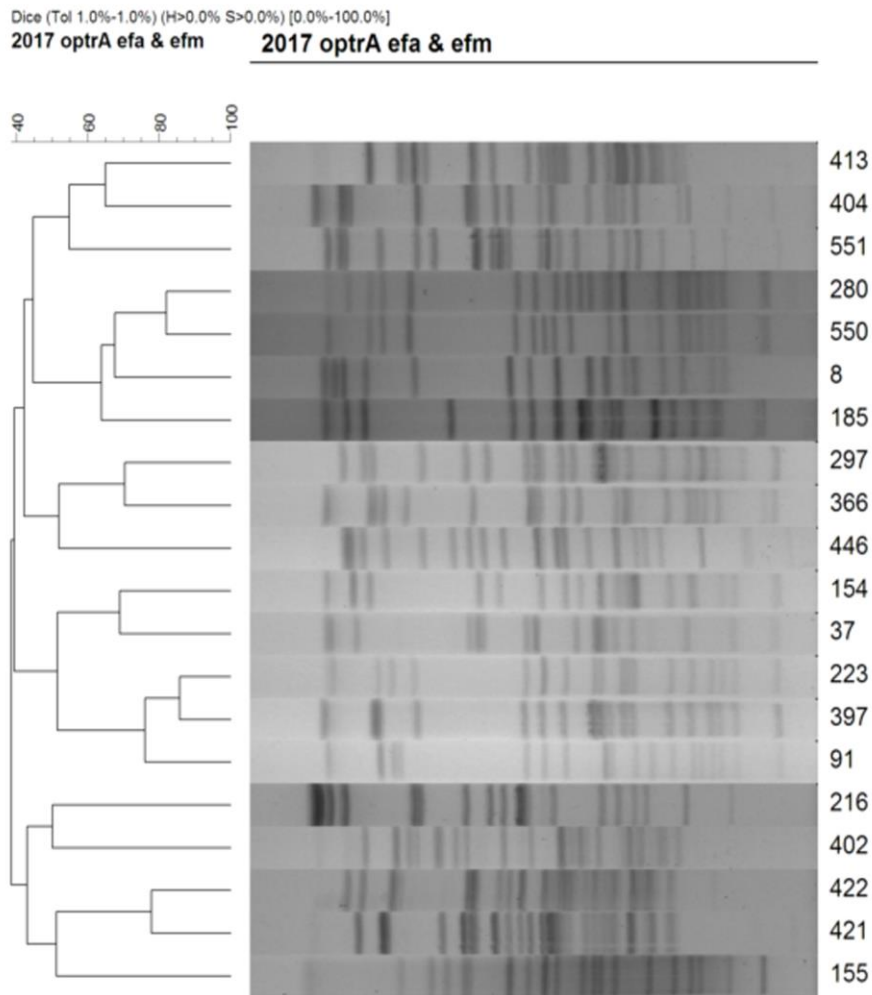

Supplementary4. This form revealed the results of the antimicrobial susceptibility test of *optrA*-positive strains in this study, including 18 antibiotics.

| Number | Isolates | LZD  | TDZ   | PEN | AMP   | IPM   | TEC   | VAN  | KAN  | NIT | RIF | FOS  | ERY | CHL | TET | TIG    | CIP | GEH500 | STH1000 |
|--------|----------|------|-------|-----|-------|-------|-------|------|------|-----|-----|------|-----|-----|-----|--------|-----|--------|---------|
| 8      | efa      | 8    | 1     | 1   | <1    | 0.125 | 0.125 | <0.5 | 256  | 16  | 2   | 64   | >16 | 64  | >8  | 0.125  | 8   | N      | P       |
| 37     | efa      | 4    | 0.25  | 2   | <1    | 0.25  | 0.125 | 1    | >256 | 8   | 1   | 64   | >16 | 32  | >8  | <0.125 | >8  | N      | P       |
| 91     | efa      | 2    | 0.25  | 2   | <1    | 0.25  | 0.125 | 1    | >256 | 8   | 1   | 64   | >16 | 64  | >8  | 0.25   | >8  | N      | P       |
| 154    | efm      | 1    | <0.25 | 16  | 8     | 8     | 0.5   | 1    | >256 | 8   | 4   | 64   | >16 | 8   | >8  | <0.125 | >8  | N      | P       |
| 155    | efa      | 4    | 0.5   | 8   | 2     | 1     | 0.25  | 1    | >256 | 8   | 2   | 64   | >16 | 32  | >8  | 0.125  | >8  | N      | P       |
| 185    | efa      | 4    | 0.5   | 2   | <1    | 0.25  | 0.25  | 1    | >256 | 16  | 1   | 64   | >16 | 32  | >8  | 0.25   | >8  | N      | P       |
| 216    | efa      | 2    | 0.5   | 4   | <1    | 0.5   | 0.25  | 1    | >256 | 16  | 2   | 128  | >16 | 64  | >8  | 0.125  | >8  | N      | P       |
| 223    | efa      | 1    | <0.25 | 2   | <1    | 0.25  | 0.25  | 1    | 32   | 8   | 1   | 128  | >16 | 8   | >8  | 0.125  | >8  | N      | P       |
| 280    | efa      | 1    | <0.25 | 2   | <1    | 0.5   | 0.25  | <0.5 | >256 | <=4 | 2   | 64   | >16 | 8   | >8  | 0.125  | >8  | N      | P       |
| 297    | efa      | 4    | 0.5   | 2   | <1    | 0.5   | 0.5   | 1    | >256 | <=4 | 2   | 128  | >16 | >64 | >8  | 0.125  | 1   | N      | N       |
| 366    | efa      | 4    | 0.5   | 2   | <1    | 0.5   | 0.25  | 1    | >256 | <=4 | 16  | 64   | >16 | 64  | >8  | <0.125 | 8   | N      | P       |
| 397    | efa      | 2    | 0.5   | 2   | <1    | 0.5   | 0.25  | 1    | >256 | 8   | 2   | 64   | >16 | 64  | >8  | 0.125  | 8   | N      | P       |
| 402    | efm      | 2    | 0.5   | >32 | >32   | 1     | 0.25  | <0.5 | >256 | 64  | 4   | >128 | >16 | 16  | >8  | <0.125 | >8  | N      | P       |
| 404    | efa      | 4    | 0.5   | 2   | <1    | 0.5   | 0.5   | <0.5 | >256 | <=4 | 2   | >128 | >16 | 64  | >8  | 0.25   | >8  | P      | P       |
| 413    | efm      | 2    | 0.5   | >32 | >32   | >8    | 0.5   | 1    | >256 | 32  | 4   | 64   | >16 | 16  | >8  | 0.25   | >8  | N      | P       |
| 421    | efm      | <0.5 | <0.25 | 32  | >32   | >8    | 1     | 1    | >256 | 16  | 2   | 64   | >16 | <=2 | >8  | 4      | 8   | N      | P       |
| 422    | efm      | 2    | <0.25 | >32 | >32   | >8    | 0.25  | <0.5 | >256 | 64  | 4   | >128 | >16 | 16  | >8  | <0.125 | >8  | N      | P       |
| 446    | efa      | 4    | 0.5   | 2   | 4     | 0.5   | 0.5   | <0.5 | >256 | 16  | 1   | 64   | >16 | >64 | >8  | <0.125 | >8  | N      | P       |
| 550    | efa      | 2    | <0.25 | 16  | <0.25 | 0.5   | 0.5   | 1    | >256 | 16  | 1   | 64   | >16 | 16  | >8  | 0.25   | >8  | N      | P       |
| 551    | efa      | 8    | 1     | 2   | <1    | 0.5   | 0.5   | <0.5 | >256 | 8   | 1   | 64   | >16 | >64 | >8  | 0.25   | >8  | N      | P       |

Note: LZD: Linezolid, TDZ: Tedizolid, PEN:Penicillin, AMP:Ampicillin, IPM:Imipenem, TEC:Teicoplanin, VAN:Vancomycin, KAN:Kanamycin, NIT:Nitrofurantoin, RIF:Rifampicin, FOS:Fosfomycin, ERY:Erythromycin, CHL:Chloramphenicol, TIG:Tigecycline, TET:Tetracycline, CIP:Ciprofloxacin, GEH500:Gentamicin 500ug/mL, STH1000:Streptomycin 1000u/mL, N:No Growth, P:Growth..
